# Supplementary material
Source: publisher site journal article supplement (https://www.dovepress.com/article/575656)
Supplement: Supplementary file 1 [file 575656%20Revised%20Supplementary%20material.docx]

**Supplementary material**

**Table S1. Choice set that includes the dominant scenario (B) presented in the DCE 1 addressed to the patients.**

|  | **Pacemaker A** | **Pacemaker B** |
| --- | --- | --- |
| **The pacemaker is …** | … large | … small |
| **Battery life is …** | … < 8 years | … ≥ 8 years |
| **The pacemaker has …** | … leads | … no leads |
| **With the pacemaker …** | … MRIs are not possible | … is possible to perform MRIs |
| **Due to its location, the pacemaker…** | … is palpable through the skin | … is not palpable through the skin |
| **When the pacemaker generator battery runs out …** | … a new one is placed without removing the old one | … a new one is placed, and the old one is removed |
| **Pacemaker follow-up …** | … is only in person without the possibility of remote follow-up | … is face-to-face and with the possibility of remote follow-up |
|  | **I prefer A** | **I prefer B** |
